# Supplementary material for: A new signature based on alternative polyadenylation for prognostic prediction and therapeutic responses in low-grade glioma
Source: publisher site journal article supplement (doi:10.18632/aging.203844), 2022-01-18
Supplement: Supplementary file [file aging-v14i2-203844-supplementary-material-SD1.pdf]

## SUPPLEMENTARY FIGURES

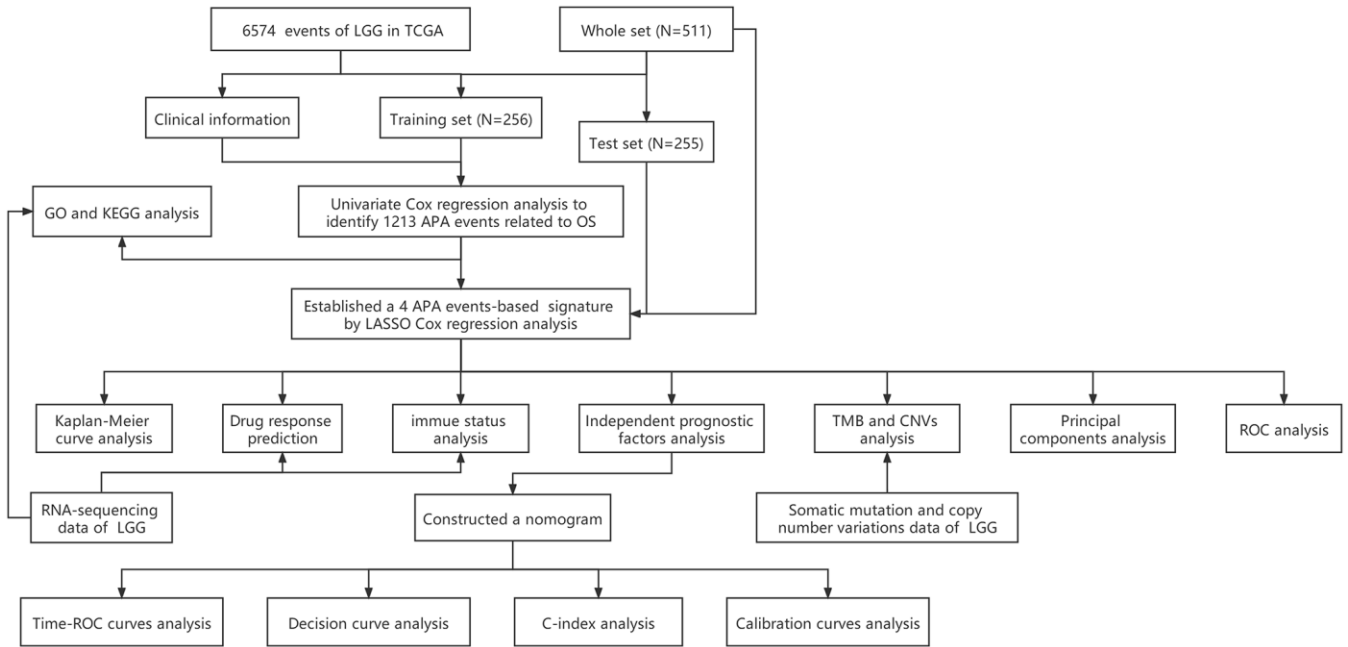

Supplementary Figure 1. Flow chart of the present study.

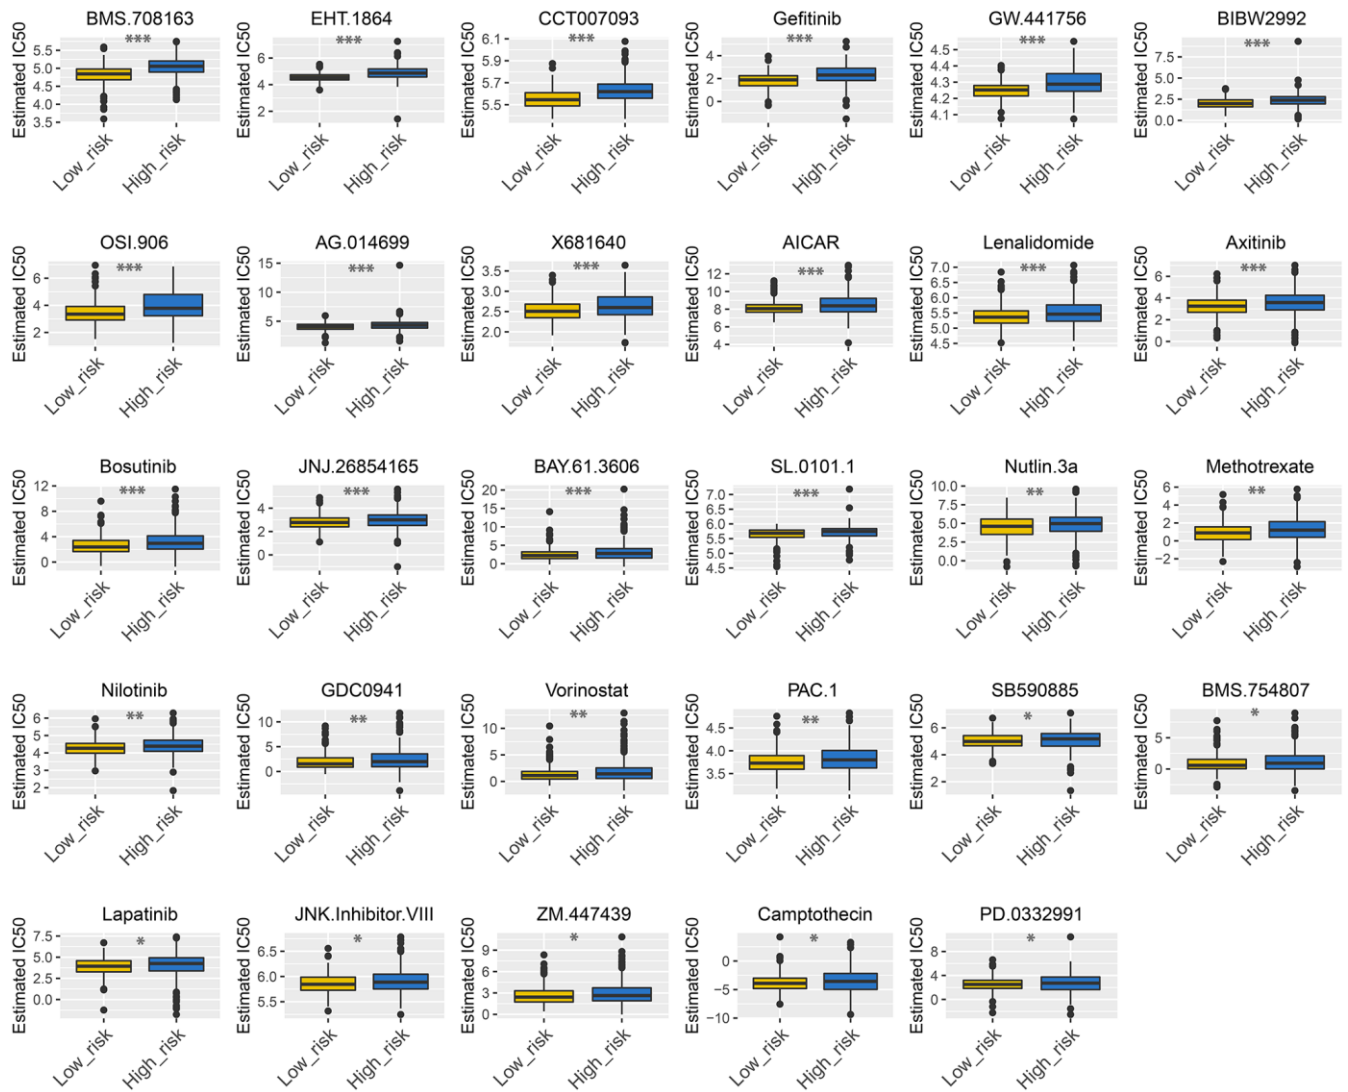

**Supplementary Figure 2. Boxplots of estimated IC50 values of potential compounds between high-risk and low-risk groups.**

\* $P < 0.05$ ; \*\* $P < 0.01$ ; \*\*\* $P < 0.001$ .
