# Supplementary material for: A new signature based on alternative polyadenylation for prognostic prediction and therapeutic responses in low-grade glioma
Source: publisher site journal article supplement (doi:10.18632/aging.203844), 2022-01-18
Supplement: Supplementary file [file aging-v14i2-203844-supplementary-material-SD2.pdf]

## SUPPLEMENTARY TABLE

Supplementary Table 1. The coefficients of the four events.

| <b>Id</b>                   | <b>Coef</b> | <b>HR</b> | <b>HR.95L</b> | <b>HR.95H</b> | <b>p value</b> |
|-----------------------------|-------------|-----------|---------------|---------------|----------------|
| `NM_013399 C16orf5 chr16 −` | 5.846687    | 346.0859  | 4.230633      | 28311.47      | 0.009273       |
| `NM_000135 FANCA chr16 −`   | 7.129974    | 1248.845  | 11.95803      | 130423.9      | 0.002645       |
| `NM_003118 SPARC chr5 −`    | −4.96019    | 0.007012  | 0.000385      | 0.127679      | 0.000808       |
| `NM_007200 AKAP13 chr15 +`  | 1.243714    | 3.468473  | 0.671534      | 17.91467      | 0.13764        |
